# Effectiveness of physical activity in obese children and adolescents and serum interleukin-10 levels: A protocol for systematic review.

Andreza Gomes Pascoal<sup>1</sup>, Paula de Souza Mendes<sup>1</sup>, Luiz Eduardo Rodrigues Lima<sup>2</sup> and Bruno Mori<sup>3, \*</sup>

<sup>1</sup> Federal University of Amazonas, Institute of Biotechnology and Health, Coari/Amazonas, Brazil

<sup>2</sup> Metropolitan University Center of Manaus/Amazonas, Brazil.

<sup>3</sup> Federal University of Amazonas, Institute of Biotechnology and Health, Coari/Amazonas, Brazil

\*Correspondence: [brunomori@ufam.edu.br](mailto:brunomori@ufam.edu.br); Tel.: +55 92984729810

**Abstract Background:** Obesity is a global health problem that affects millions of people around the world, especially children and adolescents. The main causes of obesity are a sedentary lifestyle, unhealthy diet, and lack of reduction in the level of physical activity with negative consequences for physical and mental health, such as increased risk of cardiovascular diseases, diabetes, hypertension, dyslipidemia, and inflammation. Therefore, we will carry out a perform a systematic review to evaluate the effectiveness of physical activity in obese children and adolescents and serum interleukin-10 levels.

**Methods:** This protocol is based on recommendations from the Cochrane Collaboration on the steps of a systematic review. A literature search will be performed on the following database: PubMed, the Cochrane Library, LILACS (VHL), and Google Scholar. According to the Cochrane Risk of Bias Tool and the level of evidence for results, we will assess the quality of the included studies by using the Grading of Recommendations Assessment, Development, and Evaluation (GRADE) method. The Review Manager (v5.3) software will be applied to statistical analysis.

**Results:** From the study, we will evaluate the effectiveness of physical activity in obese children and adolescents and serum IL-10 levels correlated with age, ethnicity, sex, and body mass index (BMI).PROSPERO registration number: CRD42022355721

**Strengths and limitations of this study:** This article emphasizes the importance of evaluating the effectiveness of physical activity in obese children and adolescents and provides methodological guidance for evaluating clinical evidence. This study 1)provides a research protocol, 2) facilitates reasonable assessment of physical activity in obese children and adolescents and serum IL-10 levels 3) increases the potential importance of recommending physical activity in obese children and adolescents to improve serum levels of IL-10, which in turn has an immunoprotective effect. The lack of reports of these effects may be limited by the small sample size.

**Abbreviations:** RCT = randomized controlled trials, GRADE = Grading of Recommendations Assessment Development and Evaluation, NCDs = Chronic Noncommunicable Diseases.

**Keywords:** child, interleukin-10, physical activity, obesity, protocol, systematic review

## Introduction

Regular physical activity has an inverse relationship with body weight and chronic non-communicable diseases, in addition to promoting benefits in physical fitness, it contributes to the

NOTE: This preprint reports new research that has not been certified by peer review and should not be used to guide clinical practice.

maturation of the skeletal system, helps promote health, and improves the quality of life of children and adolescents, in addition to being essential for maintaining this habit in adulthood, therefore, an important determinant of the adolescent's physical characteristics[1-2].

Several factors can influence physical activity patterns: individual characteristics, including motivation, motor skills, environmental characteristics, access to leisure spaces, architectural barriers, availability of time to practice physical activities, sociocultural support, and financial condition[3,4]. Another factor that may contribute to the increase in physical inactivity among young people is the adoption of sedentary behaviors such as watching TV and exposure to screens [5-9].

The current recommendation for physical activity in childhood and adolescence is 60 minutes or more of moderate physical activity daily, five or more days a week. However, intervention studies carried out in large urban centers demonstrate that more than 50% of children and adolescents do not meet current physical activity recommendations [10,11]. The reduction in energy expenditure (physical inactivity) in children and adolescents is the most important determinant of overweight and obesity, and it is not difficult to verify this variable in the lifestyle among children and adolescents. A systematic review and meta-analysis reveals robust evidence of a negative association between serum 25(OH)D levels <20 ng/ml and increased body mass index (obesity) and physical fitness levels [12].

Adipocyte-derived hormones play a fundamental role in regulating energy homeostasis, food intake, and many neuroendocrine functions. A state of leptin resistance has been suggested in obesity, characterizing the inflammatory process. Skeletal muscle was also recently identified as a secretory organ, the peptides produced, expressed, and released by muscle fibers were called myokines [2,12]. The factors that promote interference between adipose tissue and muscle cells and their impact on the regulation of energy homeostasis and metabolism are widely studied. However, it has been strongly suggested that physical inactivity promotes altered myokine responses, providing a potential mechanism for the association between obesity-associated sedentary behavior and many chronic diseases [13].

Interleukin 10 (IL-10) is an important anti-inflammatory and immunosuppressive cytokine that is produced by a variety of cells of the immune system, including T and B lymphocytes, monocytic cells, natural killer cells, dendritic cells, eosinophils, and neutrophils [14], is involved in several functions such as angiogenesis, lipolysis, control of glucose metabolism and regulation of inflammatory processes, demonstrating a protective effect against cardiovascular diseases and type 2 diabetes [15,16]. The chronic effect of physical exercise on inflammatory processes is a reflection of the sum of several anti-inflammatory actions promoted by the practice of physical exercise. Studies demonstrate that in response to physical effort, with the consequent triggering of an anti-inflammatory cascade, affected by the increase in circulating levels of IL-10 dependent on the practice of high-intensity physical activity, they can contribute to the chronic and subclinical inflammatory mediation caused by obesity. in children and adolescents. Therefore, we will carry out a systematic review and meta-analysis of RCTs and primary studies published to evaluate the effectiveness of physical activity in obese children and adolescents and serum interleukin-10 levels [17].

## 2. Materials and Methods

### 2.1 Study registration

The protocol for this systematic review has been registered in PROSPERO (CRD42022355721).

Besides, this protocol has been checked with preferred reporting items for systematic review and meta-analysis protocols (PRISMA-P) checklist [18].

99

## 100 2.2 Ethics

101

102 The approval of an ethics committee is not required for this protocol. Data are not  
103 individualized.

104

## 105 2.3 Inclusion criteria

106

107 2.3.1 Only clinical randomized controlled trials and primary articles to evaluate the effectiveness  
108 of physical activity in obese children and adolescents and the levels of serum interleukin-10,  
109 articles with children and adolescents who practice any type of physical activity that fits the  
110 parameters of obesity, articles that relate the practice of physical activity and interleukin-10 will  
111 be included.

112

113 2.3.2 Articles posted on PubMed, the Cochrane Library, LILACS (BVS), and Google Scholar.

114

115 2.3.3 Articles in all languages.

116

117 2.3.4 Articles published until October 2022.

118

119 2.3.5 Participants Children and adolescents, full-time schoolchildren, Children who agree to  
120 participate in the study and who have permission from their parents/guardians; Children who  
121 are in full physical ability, aged between 06 to 17 years, will be included. No restrictions on  
122 gender and race.

123

## 124 2.4 Exclusion Criteria

125

126 2.4.1 Children who do not have a consent form properly signed by their parents, as well as the  
127 Minor Consent Term, Children who have a physical or cognitive disability that does not allow  
128 them to perform the physical tests and who cannot answer the questionnaires.

129

130 2.4.2 Papers without complete data were not completed even after contacting the authors.

131

132 2.4.3 Secondary articles, such as systematic reviews with or without meta-analysis, overviews of  
133 systematic reviews.

134

135 2.4.4 Studies related to physical activity in obese children and adolescents but didn't involve  
136 Interleukin-10.

137

## 138 2.5 Search strategy

139

140 A systematic search will be performed by PubMed, the Cochrane Library, LILACS (BVS), and  
141 Google Scholar. PubMed MeSH Terms: (Child) OR "Child" [Mesh] OR (Preschool) OR  
142 (Adolescents) OR "Adolescent"[Mesh] OR (Adolescence) OR (Teens) OR (Teen) OR (Teenagers)  
143 OR (Teenager) OR (Youth) OR (Youths) OR (Adolescents, Female) OR (Adolescent, Female) OR  
144 (Female Adolescent) OR (Female Adolescents) OR (Adolescents, Male) OR (Adolescent, Male) OR  
145 (Male Adolescent) OR (Male Adolescents) AND (Exercises) OR "Exercise"[Mesh] OR (Physical  
146 Activity) OR (Activities, Physical) OR (Activity, Physical) OR (Physical Activities) OR (Exercise,  
Physical) OR (Exercises, Physical) OR (Physical Exercise) OR (Physical Exercises) OR (Acute  
Exercise) OR (Acute Exercises) OR (Exercise, Acute) OR (Exercises, Acute) OR (Exercise, Isometric)  
OR (Exercises, Isometric) OR (Isometric Exercises) OR (Isometric Exercise) OR (Exercise, Aerobic)

OR (Aerobic Exercise) OR (Aerobic Exercises) OR (Exercises, Aerobic) OR (Exercise Training) OR (Exercise Trainings) OR (Training, Exercise) OR (Trainings, Exercise) AND (obesity) OR "Obesity"[Mesh] OR (Obesity, Abdominal) OR (Obesity, Maternal) OR (Obesity, Metabolically Benign) OR (Obesity, Morbid) OR (Pediatric Obesity) AND (interleukin-10) OR "Interleukin-10"[Mesh] OR (Interleukin 10) OR (IL10) OR (IL-10) OR (CSIF-10) OR (Cytokine Synthesis Inhibitory Factor). Besides, ongoing trials will be retrieved from the Cochrane Library, LILACS (BVS), and Google Scholar. Details of the search strategy are stated as follows: (1) MeSH Terms:

Child; Preschool; Adolescents; Adolescence; Teens; Teen; Teenagers (2) Exercises; Physical Activity; Physical Activities; (3) obesity; (Obesity, Abdominal) (4) interleukin-10; Interleukin 10; IL10. Study titles and abstracts will be screened based on inclusion/exclusion criteria. We will cross-check the references cited as well. We will identify published studies until October 2022.

## 2.6 Interventions.

We will include studies that use analysis of physical activity in any modality as the only intervention in the experimental group. Studies involving physical activity combined with other sports will be included if other activity practices are equally used in both experiments and control groups.

## 2.7 Outcomes

2.7.1 The primary result. The primary outcomes are mainly assessed by (1) levels of physical activity; (2) body mass index (BMI); (3) serum levels of interleukin 10; and (4) age.

2.7.2 The secondary outcome. Not applicable.

## 2.8 Data collection and analysis

### 2.8.1 Study selection

All articles downloaded will be imported into Rayyan® to remove the duplicated studies. According to inclusion and exclusion criteria, two reviewers will independently consult the title and abstract of every searched literature. Any disagreements on study selection will be resolved through discussion with other researchers. According to the Preferred Reporting Items for Systematic Reviews and Meta-Analyses (PRISMA) guidelines [18]. The flow diagram of all study selection procedures is shown in Figure 1. According to the Grading of Recommendations Assessment, Development, and Evaluation (GRADE) method, we will summarize the GRADE judgments [19].

### 2.8.2 Data extraction

Two independent authors performed the data extraction process and the following items from each trial were arranged. (1) The basic information of the trials or publications: the title of the article, first author, year, location, and language; (2) Participation baseline of the study. The subgroup condition and statistic distribution of the sample size, age, and sex included the study's inclusion and exclusion criteria. Interventions in the observation group and the control group. Main outcome(s) and their scale basis. Besides, we will contact the lead author if

there is any missing or unavailable information.

### 2.8.3 Risk of bias assessment.

We will assess the methodological quality of randomized controlled trials following the RCT quality assessment criteria recommended in the Cochrane Reviewer's Handbook (5.3)[20]. Risk of The bias in Systematic Reviews (ROBIS) tool will evaluate the quality of reviews. Two assessors will check the results independently, and internal discussion will be performed if the results are inconsistent.

### 2.8.4 Data synthesis

The data will be analyzed and synthesized through Review Manager (v5.3) software. Relative risk (RR) with 95% confidence intervals (CI) will be used for a dichotomous variable and weighted mean difference (WMD), or standard mean difference (SMD) with 95% CI for continuous variable. Cochrane Collaboration will be employed to compute the data synthesis.

### 2.8.5 Assessment of Heterogeneity

$I^2$  statistics will evaluate heterogeneity. If  $I^2 \geq 50\%$  indicates the possibility of statistical heterogeneity, we will use a random-effects model for the calculation. Otherwise, a fixed-effects model will be used when the heterogeneity is not significant with its  $I^2 < 50\%$ .

### 2.8.6 Subgroup analysis

When heterogeneity is high, subgroup analyses will be performed for different comparators separately if necessary. We will perform a subgroup analysis when heterogeneity is high. It can be discussed as gender type, physical activity duration, and IL-10 serum levels.

### 2.8.7 Sensitivity analysis

The sensitivity analyses will be performed by excluding studies with high risks of bias and outliers that are numerically distant from the rest of the data.

### 2.8.8 Publication bias

We will make funnel plots to evaluate the potential publication when studies included in the meta-analysis are more than ten. When an asymmetry of the funnel plot implies reporting bias, we will explain possible reasons.

## 2.9 Patient and Public Involvement

Patient and Public Involvement statements are not required since this is a meta-analysis-based on published studies.

## 3. Results



The results of this systematic review will be published as a peer-reviewed article.

#### 4. Discussion

The practice of physical activity has been studied and correlated with a better quality of life in a broad sense, however, its anti-inflammatory effects have aroused common interest, given the metabolic modulation pathways [1,5]. Studies have observed an association between the level of physical activity and chronic non-communicable diseases (NCDs), obesity is a subclinical inflammatory aggravating factor [7]. Thus, detecting levels of physical activity among obese children and adolescents, as well as factors associated with physical inactivity, can contribute to the development of preventive programs that encourage the adoption of a physically active lifestyle with anti-inflammatory effects. [21,22].

Therefore, we will use a systematic review to evaluate the Effectiveness of physical activity in obese children and adolescents and serum interleukin-10 levels, to evaluate the general certainty of the evidence and the effects of physical exercise, potentially contributing to guidelines capable of implementing The results of this systematic review in clinical practice, the preferences of the monitoring team must also be considered, to determine if and when exercise should be the intervention of choice.

**Study Limitations:** Currently, the conclusion of this systematic review may not be complete due to the relatively few studies that associate the practice of physical activity in obese children and adolescents and serum levels of IL-10 mechanism, the limited number of studies, as well as the limited number of participants included. Furthermore, the interpretation of statistical analysis can be difficult due to the limitations described. New studies with larger samples measuring obesity may be essential to obtain direct tips.

#### 5. Conclusions

We hope that this study will provide relevant information about the effectiveness of physical activity in children and adolescents and serum levels of interleukin-10 and this conclusion will provide reliable evidence for more assertive clinical application. The conclusions of this review may further clarify the correlated immunobiological mechanism of physical activity and interleukin-10 expression to modulate the inflammatory effects of obesity in children and adolescents.

**Author Contributions:** Conceptualization, B.M and A.G.P.; methodology, B.M., and L.E.R.L.; software, B.M. and L.E.R.L.; validation, B.M.; formal analysis, B.M., L.E.R.L.; investigation, A.G.P.; resources, B.M.; data curation, B.M., A.G.P. and P.S.M.; writing—original draft preparation, B.M.; writing—review and editing, B.M.; supervision, B.M. All authors have read and agreed to the published version of the manuscript.

**Funding:** No financing

**Institutional Review Board Statement:** Not applicable.

**Informed Consent Statement:** Not applicable.

**Data Availability Statement:** The dataset generated during the current study is available from the corresponding authors upon reasonable request.

**Conflicts of Interest:** The authors declare no conflict of interest.

# References

1. Calcaterra V, Larizza D, Codrons E, De Silvestri A, Brambilla P, Abela S, Arpesella M, Vandoni M. Improved metabolic and cardiorespiratory fitness during a recreational training program in obese children. *J Pediatr Endocrinol Metab.* 2013;26(3-4):271-6. doi: 10.1515/jpem-2012-0157. PMID: 23327787.
2. Pedersen, B., Febbraio, M. Muscles, exercise, and obesity: skeletal muscle as a secretory organ. *Nat Rev Endocrinol* 8, 457–465 (2012). <https://doi.org/10.1038/nrendo.2012.49>
3. DeBoer MD. Obesity, systemic inflammation, and increased risk for cardiovascular disease and diabetes among adolescents: a need for screening tools to target interventions. *Nutrition.* 2013 Feb;29(2):379-86. doi: 10.1016/j.nut.2012.07.003. Epub 2012 Sep 28. PMID: 23022122; PMCID: PMC3578702.
4. Blüher S, Petroff D, Wagner A, et al. The one-year exercise and lifestyle intervention program KLAKE: effects on anthropometric parameters, *cardiometabolic risk factors and glycemic control in childhood obesity Metabolism* 2014: 422-443. doi: [10.1016/j.metabol.2013.11.016](https://doi.org/10.1016/j.metabol.2013.11.016).
5. Moreno-Navarrete JM, Ortega F, Serrano M, Guerra E, Pardo G, Tinahones F, Ricart W, Fernández-Real JM. Irisin is expressed and produced by human muscle and adipose tissue in association with obesity and insulin resistance. *J Clin Endocrinol Metab.* 2013 Apr;98(4):E769-78. doi: 10.1210/jc.2012-2749. Epub 2013 Feb 22. PMID: 23436919.
6. Norris SA, Frongillo EA, Black MM, Dong Y, Fall C, Lampl M, Liese AD, Naguib M, Prentice A, Rochat T, Stephensen CB, Tinago CB, Ward KA, Wrottesley SV, Patton GC. Nutrition in adolescent growth and development. *Lancet.* 2022 Jan 8;399(10320):172-184. doi: 10.1016/S0140-6736(21)01590-7. Epub 2021 Nov 29. PMID: 34856190.
7. Alberga AS, Prud'homme D, Sigal RJ, Goldfield GS, Hadjiyannakis S, Phillips P, Malcolm J, Ma J, Doucette S, Gougeon R, Wells GA, Kenny GP. Effects of aerobic training, resistance training, or both on cardiorespiratory and musculoskeletal fitness in adolescents with obesity: the HEARTY trial. *Appl Physiol Nutr Metab.* 2016 Mar;41(3):255-65. doi: 10.1139/apnm-2015-0413. Epub 2015 Nov 9. PMID: 26881317.
8. Henriksson H, Henriksson P, Tynelius P, Ekstedt M, Berglind D, Labayen I, Ruiz JR, Lavie CJ, Ortega FB. Cardiorespiratory fitness, muscular strength, and obesity in adolescence and later chronic disability due to cardiovascular disease: a cohort study of 1 million men. *Eur Heart J.* 2020 Apr 14;41(15):1503-1510. doi: 10.1093/eurheartj/ehz774. PMID: 31710669; PMCID: PMC7154806.
9. Shawar RS, Puyau M, Shypailo R, Musaad S, Butte NF, Bacha F. Adiposity, Insulin Resistance, Cardiorespiratory Fitness, and Bone Health in Hispanic Children. *J Clin Endocrinol Metab.* 2022 Aug 18;107(9):e3797-e3804. doi: 10.1210/clinem/dgac344. PMID: 35662345; PMCID: PMC9387690.
10. Johansson L, Putri RR, Danielsson P, Hagströmer M, Marcus C. Associations between

cardiorespiratory fitness and cardiometabolic risk factors in children and adolescents with obesity. *Sci Rep.* 2023 May 5;13(1):7289. doi: 10.1038/s41598-023-34374-7. PMID: 37147377; PMCID: PMC10163218.

11. de Almeida Santana CC, Farah BQ, de Azevedo LB, Hill JO, Gunnarsdottir T, Botero JP, do Prado EC, do Prado WL. Associations Between Cardiorespiratory Fitness and Overweight With Academic Performance in 12-Year-Old Brazilian Children. *Pediatr Exerc Sci.* 2017 May;29(2):220-227. doi: 10.1123/pes.2016-0048. Epub 2016 Sep 6. PMID: 27618206.

12. Mori B, Barcellos JFM, Lima LER, Zaranza V, Autran RG, Camargo EB, Souza CSM. Relationship between vitamin D and physical activity: systematic review and meta-analysis. *Braz J Biol.* 2022 Nov 28;82:e263882. doi: 10.1590/1519-6984.263882. PMID: 36449828.

13. Joensuu L, Kujala UM, Kankaanpää A, Syväoja HJ, Kulmala J, Hakonen H, Oksanen H, Kallio J, Tammelin TH. Physical fitness development is about changes in body composition and physical activity in adolescence. *Scand J Med Sci Sports.* 2021 Feb;31(2):456-464. doi: 10.1111/sms.13847. Epub 2020 Oct 19. PMID: 33038034.

14. Fearnbach SN, Johannsen NM, Martin CK, Katzmarzyk PT, Beyl RA, Hsia DS, Carmichael OT, Staiano AE. A Pilot Study of Cardiorespiratory Fitness, Adiposity, and Cardiometabolic Health in Youth With Overweight and Obesity. *Pediatr Exerc Sci.* 2020 Apr 25;32(3):124-131. doi: 10.1123/pes.2019-0192. PMID: 32335525; PMCID: PMC7606316.

15. Machado EA, Farinatti P, Sicuro FL, Rodrigues F Jr, Bouskela E, Collett-Solberg PF. Daily physical activity, cardiorespiratory fitness, nutritional status, endothelial function, and autonomic modulation in school-age adolescents: A principal component analysis. *Obes Res Clin Pract.* 2021 May-Jun;15(3):205-211. doi: 10.1016/j.orcp.2021.04.004. Epub 2021 Apr 24. PMID: 33903023.

16. D'Alleva M, Lazzer S, Tringali G, De Micheli R, Bondesan A, Abbruzzese L, Sartorio A. Effects of combined training or moderate-intensity continuous training during a 3-week multidisciplinary body weight reduction program on cardiorespiratory fitness, body composition, and substrate oxidation rate in adolescents with obesity. *Sci Rep.* 2023 Oct 17;13(1):17609. doi: 10.1038/s41598-023-44953-3. PMID: 37848570; PMCID: PMC10582026.

17. Neves PR da S, Tenório TR dos S, Muniz MTC, Valle Neto LM do, Botero JP, Oyama LM, et al.. Efeitos de diferentes intensidades de exercício sobre a concentração sérica de interleucinas. *Rev bras educ fis esporte* [Internet]. 2014Oct;28(4):545-52. Available from: <https://doi.org/10.1590/1807-55092014000400545>.

18. Shamseer L.; Moher D.; Clarke M.; Ghersi D.; Liberati A.; Petticrew M.; Shekelle P.; Stewart L.A. PRISMA-PGroup. Preferred reporting items for systematic review and meta-analysis protocols (PRISMA-P) 2015: elaboration and explanation. *BMJ.* 2015, 350, g7647.

19. Schünemann H, Brożek J, Guyatt G, Oxman A, editors. GRADE handbook for grading the quality of evidence and strength of recommendations. Updated October 2013. The GRADE Working Group, 2013. Available from [guidelinedevelopment.org/handbook](http://guidelinedevelopment.org/handbook). When referring to a specific chapter or subsection refer to it by the title and section number, not page numbers.



20. Higgins JPT, Thomas J, Chandler J, Cumpston M, Li T, Page MJ, Welch VA (editors). *Cochrane Handbook for Systematic Reviews of Interventions* version 6.4 (updated August 2023). Cochrane, 2023. Available from [www.training.cochrane.org/handbook](http://www.training.cochrane.org/handbook).
21. Tornquist L, Tornquist D, Schneiders LB, Franke SIR, Renner JDP, Reuter CP. Cardiometabolic Risk in Children and Adolescents: The Paradox between Body Mass Index and Cardiorespiratory Fitness. *Arq Bras Cardiol.* 2022 Aug;119(2):236-243. English, Portuguese. doi: 10.36660/abc.20210593. PMID: 35946702; PMCID: PMC9363058.
22. Brand C, Reuter CP, Gaya AR, Mota J, Duncan M, Borfe L, Pollo Renner JD. Association between cardiorespiratory fitness and cardiometabolic risk factors in Brazilian children and adolescents: the mediating role of obesity parameters. *Paediatr Int Child Health.* 2021 May;41(2):93-102. doi: 10.1080/20469047.2020.1838758. Epub 2020 Oct 28. PMID: 33112727.

PRISMA 2020 flow diagram for updated systematic reviews which included searches of databases, registers and other sources

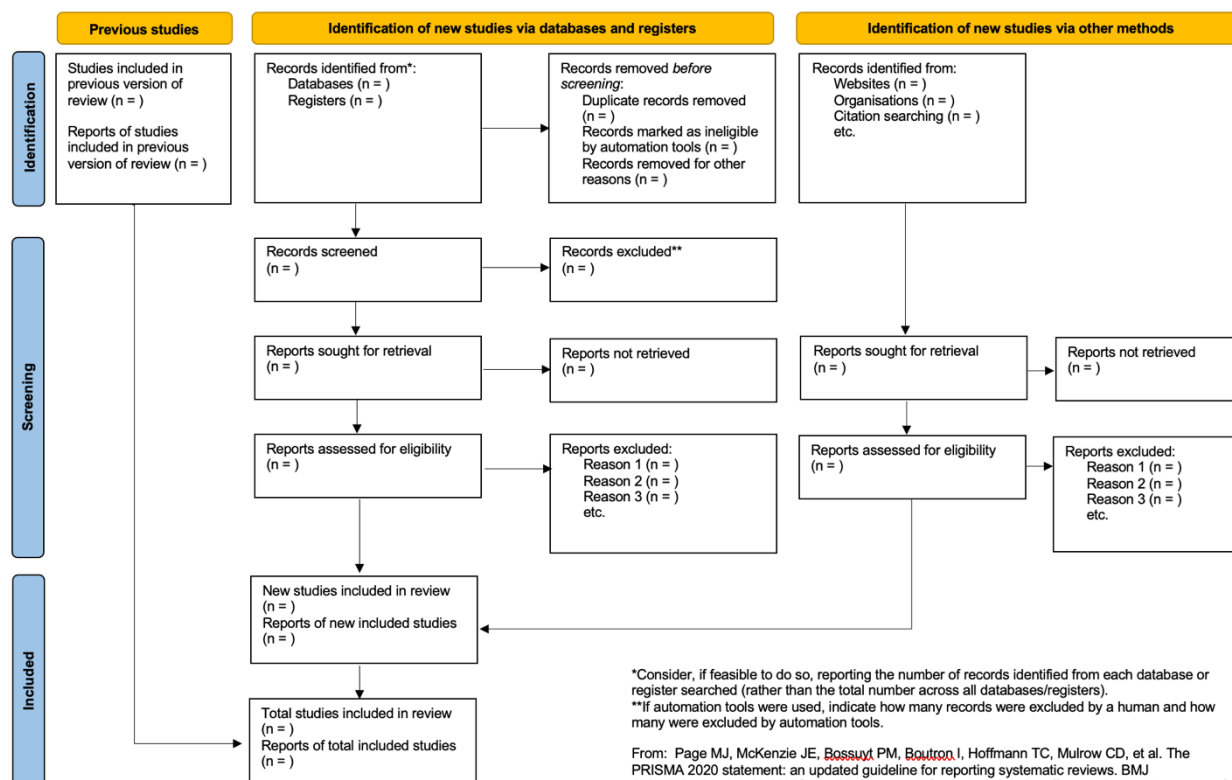

Source: http://medrxiv.stage.highwire.org/content/10.1101/2024.02.29.24303561v1.full.pdf
